# Supplementary material for: Comparative genomics of Leishmania (Mundinia)
Source: BMC Genomics. 2019 Oct 11;20:726. doi: 10.1186/s12864-019-6126-y (PMC6787982; doi:10.1186/s12864-019-6126-y)
Supplement: Supplementary file 26 — Additional file 26: Table S11. Gene family expansion and contractions at the Leishmania (Mundinia) node. [file 12864_2019_6126_MOESM26_ESM.xlsx]

## Sheet: Supp. Table 10
Gene family expansions at the Leishmania (Mundinia) node
OG group	Change in gene number	Representative gene	Annotation	KEGG ID	Length, aa	#GO	GO IDs	GO Names	InterPro IDs	InterPro GO IDs	InterPro GO Names
OG0000691	1	LMAR_010011100.1	Eukaryotic initiation factor 4A-1	K13025	403	2	F:GO:0003676; F:GO:0005524	F:nucleic acid binding; F:ATP binding	IPR001650 (PFAM); IPR011545 (PFAM); G3DSA:3.40.50.300 (GENE3D); G3DSA:3.40.50.300 (GENE3D); mobidb-lite (MOBIDB_LITE); PTHR24031:SF533 (PANTHER); PTHR24031 (PANTHER); IPR000629 (PROSITE_PATTERNS); IPR014001 (PROSITE_PROFILES); IPR001650 (PROSITE_PROFILES); IPR014014 (PROSITE_PROFILES); cd00268 (CDD); IPR001650 (CDD); IPR027417 (SUPERFAMILY)	F:GO:0003676; F:GO:0005524	F:nucleic acid binding; F:ATP binding
OG0000990	1	LMAR_200016500.1	exosome-associated protein 1	-	405	-	-	-	mobidb-lite (MOBIDB_LITE); PTHR11097 (PANTHER); PTHR11097:SF8 (PANTHER); IPR020568 (SUPERFAMILY)	no GO terms	no GO terms
OG0002263	1	LMAR_000013800.1	hypothetical protein	-	113	-	-	-	IPR032675 (G3DSA:3.80.10.GENE3D); PTHR24106:SF247 (PANTHER); PTHR24106 (PANTHER); SSF52047 (SUPERFAMILY)	no GO terms	no GO terms
OG0005083	1	LMAR_360023300.1	glucokinase	K00845	426	5	F:GO:0004340; F:GO:0005524; F:GO:0005536; P:GO:0006096; P:GO:0051156	F:glucokinase activity; F:ATP binding; F:glucose binding; P:glycolytic process; P:glucose 6-phosphate metabolic process	IPR003836 (PFAM); G3DSA:3.30.420.40 (GENE3D); G3DSA:3.40.367.20 (GENE3D); PTHR30514:SF0 (PANTHER); PTHR30514 (PANTHER); cd00012 (CDD); SSF53067 (SUPERFAMILY)	F:GO:0004340; F:GO:0005524; F:GO:0005536; P:GO:0006096; P:GO:0051156	F:glucokinase activity; F:ATP binding; F:glucose binding; P:glycolytic process; P:glucose 6-phosphate metabolic process
OG0005512	1	LMAR_000166100.1	ion transport protein	-	120	-	-	-	G3DSA:1.10.287.70 (GENE3D); PTHR10037:SF62 (PANTHER); PTHR10037 (PANTHER)	no GO terms	no GO terms
OG0005892	2	LMAR_000043400.1	inositol 145-trisphosphate receptor	-	87	-	-	-	no IPS match	no IPS match	no IPS match
OG0006353	1	LMAR_000112800.1	5'a2rel-related protein	-	237	-	-	-	mobidb-lite (MOBIDB_LITE); mobidb-lite (MOBIDB_LITE); mobidb-lite (MOBIDB_LITE); mobidb-lite (MOBIDB_LITE)	no GO terms	no GO terms
OG0006423	1	LMAR_280007600.1	hypothetical protein	-	199	-	-	-	no IPS match	no IPS match	no IPS match
OG0006529	1	LMAR_300007800.1	hypothetical protein	-	178	-	-	-	no IPS match	no IPS match	no IPS match
Gene family contractions at the Leishmania (Mundinia) node
OG group	Change in gene number	Representative gene	Annotation	KEGG ID	Length, aa	#GO	GO IDs	GO Names	InterPro IDs	InterPro GO IDs	InterPro GO Names
OG0000061	1	LmjF.13.1700	hypothetical protein	-	457	-	-	-	IPR032675 (G3DSA:3.80.10.GENE3D); PTHR44036 (PANTHER); PTHR44036:SF2 (PANTHER); SSF52058 (SUPERFAMILY)	no GO terms	no GO terms
OG0000100	1	LmjF.09.0970	elongation factor-1 gamma	K03233	404	3	F:GO:0003746; F:GO:0005515; P:GO:0006414	F:translation elongation factor activity; F:protein binding; P:translational elongation	IPR004045 (PFAM); IPR004046 (PFAM); G3DSA:3.40.30.10 (GENE3D); IPR036433 (G3DSA:3.30.70.GENE3D); IPR001662 (PFAM); G3DSA:1.20.1050.10 (GENE3D),SFLDG00358 (SFLD),SFLDS00019 (SFLD); IPR040079 (mobidb-MOBIDB_LITE); mobidb-lite (MOBIDB_LITE); PTHR43986 (PANTHER); IPR001662 (PROSITE_PROFILES); IPR004045 (PROSITE_PROFILES); IPR010987 (PROSITE_PROFILES); cd03044 (CDD); cd03181 (CDD); IPR036433 (SUPERFAM…	F:GO:0003746; F:GO:0005515; P:GO:0006414	F:translation elongation factor activity; F:protein binding; P:translational elongation
OG0000112	1	LmjF.17.0080	elongation factor 1-alpha	K03231	449	5	F:GO:0003746; F:GO:0003924; F:GO:0005525; C:GO:0005737; P:GO:0006414	F:translation elongation factor activity; F:GTPase activity; F:GTP binding; C:cytoplasm; P:translational elongation	IPR000795 (PRINTS); G3DSA:2.40.30.10 (GENE3D); IPR004160 (PFAM); G3DSA:2.40.30.10 (GENE3D); IPR004539 (TIGRFAM); IPR000795 (PFAM); IPR004161 (PFAM); G3DSA:3.40.50.300 (GENE3D); PTHR23115:SF230 (PANTHER); PTHR23115 (PANTHER); IPR031157 (PROSITE_PATTERNS); IPR000795 (PROSITE_PROFILES); IPR004539 (HAMAP); cd01883 (CDD); cd03705 (CDD); cd03693 (CDD); IPR009001 (SUPERFAMILY); IPR009000 (SUPERFAMILY); …	F:GO:0003746; F:GO:0003924; F:GO:0005525; C:GO:0005737; P:GO:0006414	F:translation elongation factor activity; F:GTPase activity; F:GTP binding; C:cytoplasm; P:translational elongation
OG0000120	3	LmjF.13.0280	alpha tubulin	K07374	451	5	F:GO:0003924; F:GO:0005200; F:GO:0005525; C:GO:0005874; P:GO:0007017	F:GTPase activity; F:structural constituent of cytoskeleton; F:GTP binding; C:microtubule; P:microtubule-based process	Coil (COILS); IPR002452 (PRINTS); IPR000217 (PRINTS); IPR036525 (G3DSA:3.40.50.GENE3D); IPR037103 (G3DSA:3.30.1330.GENE3D); IPR018316 (PFAM); IPR003008 (PFAM); IPR023123 (G3DSA:1.10.287.GENE3D); PTHR11588:SF254 (PANTHER); IPR000217 (PANTHER); IPR017975 (PROSITE_PATTERNS); cd02186 (CDD); IPR008280 (SUPERFAMILY); IPR036525 (SUPERFAMILY)	F:GO:0003924; F:GO:0005200; F:GO:0005525; C:GO:0005874; P:GO:0007017	F:GTPase activity; F:structural constituent of cytoskeleton; F:GTP binding; C:microtubule; P:microtubule-based process
OG0000129	2	LmjF.09.0910	calmodulin	K02183	149	1	F:GO:0005509	F:calcium ion binding	IPR002048 (PFAM); G3DSA:1.10.238.10 (GENE3D); G3DSA:1.10.238.10 (GENE3D); G3DSA:1.10.238.10 (GENE3D); PTHR23050:SF236 (PANTHER); PTHR23050 (PANTHER); IPR018247 (PROSITE_PATTERNS); IPR018247 (PROSITE_PATTERNS); IPR018247 (PROSITE_PATTERNS); IPR018247 (PROSITE_PATTERNS); IPR002048 (PROSITE_PROFILES); IPR002048 (PROSITE_PROFILES); IPR002048 (PROSITE_PROFILES); IPR002048 (PROSITE_PROFILES); IPR002048…	F:GO:0005509	F:calcium ion binding
OG0000160	2	LmjF.34.0820	translation elongation factor 1-beta	K03232	237	3	F:GO:0003746; C:GO:0005853; P:GO:0006414	F:translation elongation factor activity; C:eukaryotic translation elongation factor 1 complex; P:translational elongation	IPR014038 (PFAM); IPR014717 (G3DSA:3.30.70.GENE3D); mobidb-lite (MOBIDB_LITE); PTHR11595 (PANTHER); PTHR11595:SF46 (PANTHER); IPR001326 (PROSITE_PATTERNS); IPR001326 (PROSITE_PATTERNS); IPR014038 (CDD); IPR036219 (SUPERFAMILY)	F:GO:0003746; C:GO:0005853; P:GO:0006414	F:translation elongation factor activity; C:eukaryotic translation elongation factor 1 complex; P:translational elongation
OG0000190	2	LmjF.32.3130	ribosomal protein L3	K02925	419	3	F:GO:0003735; C:GO:0005840; P:GO:0006412	F:structural constituent of ribosome; C:ribosome; P:translation	IPR000597 (PFAM); G3DSA:3.30.1430.10 (GENE3D); G3DSA:4.10.960.10 (GENE3D); G3DSA:2.40.30.10 (GENE3D); PTHR11363:SF6 (PANTHER); PTHR11363 (PANTHER); IPR019926 (PROSITE_PATTERNS); IPR009000 (SUPERFAMILY)	F:GO:0003735; C:GO:0005622; C:GO:0005840; P:GO:0006412	F:structural constituent of ribosome; C:intracellular; C:ribosome; P:translation
OG0000196	1	LmjF.22.1290	ribonucleoside-diphosphate reductase small chain	K00526	392	3	P:GO:0009263; F:GO:0016491; P:GO:0055114	P:deoxyribonucleotide biosynthetic process; F:oxidoreductase activity; P:oxidation-reduction process	IPR000358 (PFAM); IPR012348 (G3DSA:1.10.620.GENE3D); mobidb-lite (MOBIDB_LITE); IPR000358 (PANTHER); PTHR23409:SF20 (PANTHER); IPR030475 (PROSITE_PATTERNS); IPR033909 (CDD); IPR009078 (SUPERFAMILY)	P:GO:0009263; F:GO:0016491; P:GO:0055114	P:deoxyribonucleotide biosynthetic process; F:oxidoreductase activity; P:oxidation-reduction process
OG0000265	1	LmjF.36.5250	hypothetical protein	-	3613	-	-	-	Coil (COILS); Coil (COILS); Coil (COILS); Coil (COILS); Coil (COILS); Coil (COILS); Coil (COILS); Coil (COILS); Coil (COILS); Coil (COILS); Coil (COILS); Coil (COILS); Coil (COILS); Coil (COILS); Coil (COILS); Coil (COILS); Coil (COILS); Coil (COILS); Coil (COILS); mobidb-lite (MOBIDB_LITE); mobidb-lite (MOBIDB_LITE); mobidb-lite (MOBIDB_LITE); mobidb-lite (MOBIDB_LITE); mobidb-lite (MOBIDB_LITE)…	no GO terms	no GO terms
OG0000266	2	LmjF.29.1070	ribosomal protein L1a	K02930	373	3	F:GO:0003735; C:GO:0005840; P:GO:0006412	F:structural constituent of ribosome; C:ribosome; P:translation	IPR023574 (G3DSA:3.40.1370.GENE3D); IPR002136 (PFAM); IPR025755 (PFAM); mobidb-lite (MOBIDB_LITE); mobidb-lite (MOBIDB_LITE); PTHR19431 (PANTHER); IPR013000 (PROSITE_PATTERNS); IPR023574 (SUPERFAMILY)	F:GO:0003735; C:GO:0005840; P:GO:0006412	F:structural constituent of ribosome; C:ribosome; P:translation
OG0000280	1	LmjF.16.1580	kinesin	K20196	1083	4	F:GO:0003777; F:GO:0005524; P:GO:0007018; F:GO:0008017	F:microtubule motor activity; F:ATP binding; P:microtubule-based movement; F:microtubule binding	Coil (COILS); Coil (COILS); Coil (COILS); Coil (COILS); IPR001752 (PRINTS); IPR036961 (G3DSA:3.40.850.GENE3D); IPR011993 (G3DSA:2.30.29.GENE3D); IPR036961 (G3DSA:3.40.850.GENE3D); IPR001752 (PFAM); mobidb-lite (MOBIDB_LITE); mobidb-lite (MOBIDB_LITE); PTHR24115:SF736 (PANTHER); IPR027640 (PANTHER); IPR001752 (PROSITE_PROFILES); SSF50729 (SUPERFAMILY); IPR027417 (SUPERFAMILY)	F:GO:0003777; F:GO:0005524; P:GO:0007018; F:GO:0008017	F:microtubule motor activity; F:ATP binding; P:microtubule-based movement; F:microtubule binding
OG0000287	1	LmjF.36.0180	elongation factor 2	K03234	845	2	F:GO:0003924; F:GO:0005525	F:GTPase activity; F:GTP binding	IPR000795 (PRINTS); IPR000640 (PFAM); IPR004161 (PFAM); G3DSA:3.30.70.870 (GENE3D); IPR005517 (PFAM); IPR005225 (TIGRFAM); IPR000795 (PFAM); G3DSA:3.40.50.300 (GENE3D); PF14492 (PFAM); G3DSA:3.30.70.240 (GENE3D); G3DSA:3.90.1430.10 (GENE3D); G3DSA:2.40.30.10 (GENE3D); IPR014721 (G3DSA:3.30.230.GENE3D); PTHR42908 (PANTHER); PTHR42908:SF10 (PANTHER); IPR000795 (PROSITE_PROFILES); cd04096 (CDD); cd1…	F:GO:0003924; F:GO:0005525	F:GTPase activity; F:GTP binding
OG0000292	1	LmjF.31.1960	tryparedoxin 4	K17609	186	1	P:GO:0045454	P:cell redox homeostasis	IPR012336 (PFAM); G3DSA:3.40.30.10 (GENE3D); PTHR13871 (PANTHER); PTHR13871:SF78 (PANTHER); PTHR13871:SF78 (PANTHER); IPR017937 (PROSITE_PATTERNS); IPR013766 (PROSITE_PROFILES); IPR036249 (SUPERFAMILY)	P:GO:0045454	P:cell redox homeostasis
OG0000300	1	LmjF.34.1400	d-isomer specific 2-hydroxyacid dehydrogenase-like protein	-	326	2	F:GO:0051287; P:GO:0055114	F:NAD binding; P:oxidation-reduction process	IPR006140 (PFAM); G3DSA:3.40.50.720 (GENE3D); G3DSA:3.40.50.720 (GENE3D); PTHR43333 (PANTHER); IPR036291 (SUPERFAMILY); SSF52283 (SUPERFAMILY)	F:GO:0051287; P:GO:0055114	F:NAD binding; P:oxidation-reduction process
OG0000337	2	LmjF.01.0830	peptidyl dipeptidase	K01284	678	2	F:GO:0004222; P:GO:0006508	F:metalloendopeptidase activity; P:proteolysis	Coil (COILS); IPR024077 (G3DSA:1.10.1370.GENE3D); G3DSA:1.10.1370.40 (GENE3D); IPR001567 (PFAM); PTHR43660 (PANTHER); IPR034005 (CDD); SSF55486 (SUPERFAMILY)	F:GO:0004222; P:GO:0006508; F:GO:0008233	F:metalloendopeptidase activity; P:proteolysis; F:peptidase activity
OG0000370	2	LmjF.30.0670	40S ribosomal protein S30	K02983	66	3	F:GO:0003735; C:GO:0005840; P:GO:0006412	F:structural constituent of ribosome; C:ribosome; P:translation	IPR006846 (PFAM); mobidb-lite (MOBIDB_LITE); PTHR12650:SF15 (PANTHER); PTHR12650 (PANTHER)	F:GO:0003735; C:GO:0005622; C:GO:0005840; P:GO:0006412	F:structural constituent of ribosome; C:intracellular; C:ribosome; P:translation
OG0000403	1	LmjF.05.0500	ATP synthase F1 alpha subunit	K02111	574	4	F:GO:0005524; P:GO:0015986; C:GO:0045261; F:GO:0046933	F:ATP binding; P:ATP synthesis coupled proton transport; C:proton-transporting ATP synthase complex, catalytic core F(1); F:proton-transporting ATP synthase activity, rotational mechanism	G3DSA:3.40.50.300 (GENE3D); IPR000793 (PFAM); IPR005294 (TIGRFAM); IPR038376 (G3DSA:1.20.150.GENE3D); IPR000194 (PFAM); PTHR43089 (PANTHER); PTHR43089:SF2 (PANTHER); IPR020003 (PROSITE_PATTERNS); IPR027417 (SUPERFAMILY); SSF47917 (SUPERFAMILY)	F:GO:0005524; P:GO:0015986; C:GO:0045261; F:GO:0046933	F:ATP binding; P:ATP synthesis coupled proton transport; C:proton-transporting ATP synthase complex, catalytic core F(1); F:proton-transporting ATP synthase activity, rotational mechanism
OG0000404	1	LmjF.02.0040	Xaa-Pro aminopeptidase	K01262	619	1	F:GO:0070006	F:metalloaminopeptidase activity	IPR029149 (G3DSA:3.40.350.GENE3D); PF16189 (PFAM); IPR000587 (PFAM); G3DSA:3.90.230.10 (GENE3D); IPR000994 (PFAM); IPR032416 (PFAM); IPR029149 (G3DSA:3.40.350.GENE3D); PTHR43763 (PANTHER); PTHR43763:SF3 (PANTHER); IPR001131 (PROSITE_PATTERNS); IPR033740 (CDD); IPR029149 (SUPERFAMILY); IPR029149 (SUPERFAMILY); IPR036005 (SUPERFAMILY)	F:GO:0016787; F:GO:0070006	F:hydrolase activity; F:metalloaminopeptidase activity
OG0000411	1	LmjF.22.0420	40S ribosomal protein S15	K02958	152	4	F:GO:0003723; F:GO:0003735; P:GO:0006412; C:GO:0015935	F:RNA binding; F:structural constituent of ribosome; P:translation; C:small ribosomal subunit	IPR002222 (PRINTS); IPR023575 (G3DSA:3.30.860.GENE3D); IPR002222 (PFAM); IPR005713 (TIGRFAM); IPR002222 (PIRSF); IPR002222 (PANTHER); PTHR11880:SF2 (PANTHER); IPR020934 (PROSITE_PATTERNS); IPR002222 (HAMAP); IPR023575 (SUPERFAMILY)	F:GO:0003723; F:GO:0003735; C:GO:0005840; P:GO:0006412; C:GO:0015935	F:RNA binding; F:structural constituent of ribosome; C:ribosome; P:translation; C:small ribosomal subunit
OG0000437	1	LmjF.31.2250	32-trans-enoyl-CoA isomerase mitochondrial precursor	K13238	380	1	F:GO:0003824	F:catalytic activity	G3DSA:3.90.226.10 (GENE3D); IPR001753 (PFAM); mobidb-lite (MOBIDB_LITE); mobidb-lite (MOBIDB_LITE); PTHR11941:SF34 (PANTHER); PTHR11941 (PANTHER); IPR018376 (PROSITE_PATTERNS); cd06558 (CDD); IPR029045 (SUPERFAMILY)	F:GO:0003824	F:catalytic activity
OG0000444	1	LmjF.29.2860	40S ribosomal protein S19 protein	K02966	161	3	F:GO:0003735; C:GO:0005840; P:GO:0006412	F:structural constituent of ribosome; C:ribosome; P:translation	IPR001266 (PFAM); IPR038111 (G3DSA:1.10.10.GENE3D); IPR001266 (PANTHER); PTHR11710:SF8 (PANTHER); IPR001266 (PRODOM); IPR036390 (SUPERFAMILY)	F:GO:0003735; C:GO:0005840; P:GO:0006412	F:structural constituent of ribosome; C:ribosome; P:translation
OG0000464	1	LmjF.26.1670	sphingolipid delta 4 desaturase	K04712	352	3	C:GO:0016021; P:GO:0030148; F:GO:0042284	C:integral component of membrane; P:sphingolipid biosynthetic process; F:sphingolipid delta-4 desaturase activity	IPR011388 (PIRSF); IPR013866 (PFAM); IPR005804 (PFAM); mobidb-lite (MOBIDB_LITE); PTHR12879 (PANTHER); IPR011388 (CDD)	P:GO:0006629; C:GO:0016021; P:GO:0030148; F:GO:0042284	P:lipid metabolic process; C:integral component of membrane; P:sphingolipid biosynthetic process; F:sphingolipid delta-4 desaturase activity
OG0000466	1	LmjF.06.1290	cytochrome b5-like Heme/Steroid binding domain containing protein	-	123	-	-	-	IPR001199 (PFAM); IPR036400 (G3DSA:3.10.120.GENE3D); PTHR19359 (PANTHER); PTHR19359:SF44 (PANTHER); IPR036400 (SUPERFAMILY)	no GO terms	no GO terms
OG0000480	1	LmjF.36.3800	aminomethyltransferase mitochondrial	K00605	394	3	F:GO:0004047; F:GO:0005515; P:GO:0006546	F:aminomethyltransferase activity; F:protein binding; P:glycine catabolic process	IPR013977 (PFAM); G3DSA:3.30.70.1400 (GENE3D); IPR006223 (TIGRFAM); G3DSA:4.10.1250.10 (GENE3D); G3DSA:2.40.30.110 (GENE3D); IPR028896 (PIRSF); IPR027266 (G3DSA:3.30.1360.GENE3D); IPR006222 (PFAM); PTHR43757:SF2 (PANTHER); PTHR43757 (PANTHER); IPR029043 (SUPERFAMILY); SSF103025 (SUPERFAMILY)	F:GO:0004047; F:GO:0005515; P:GO:0006546	F:aminomethyltransferase activity; F:protein binding; P:glycine catabolic process
OG0000512	1	LmjF.35.1450	hypothetical protein	-	3277	-	-	-	Coil (COILS); Coil (COILS); Coil (COILS); Coil (COILS); Coil (COILS); Coil (COILS); Coil (COILS); Coil (COILS); Coil (COILS); Coil (COILS); Coil (COILS); Coil (COILS); Coil (COILS); mobidb-lite (MOBIDB_LITE); mobidb-lite (MOBIDB_LITE); mobidb-lite (MOBIDB_LITE); mobidb-lite (MOBIDB_LITE); mobidb-lite (MOBIDB_LITE); mobidb-lite (MOBIDB_LITE); mobidb-lite (MOBIDB_LITE); mobidb-lite (MOBIDB_LITE); m…	no GO terms	no GO terms
OG0000540	1	LmjF.28.1340	haloacid dehalogenase-like hydrolase-like protein	-	188	-	-	-	IPR023214 (G3DSA:3.40.50.GENE3D); G3DSA:3.30.1240.10 (GENE3D); PF08282 (PFAM); PTHR10000:SF48 (PANTHER); PTHR10000 (PANTHER); IPR036412 (SUPERFAMILY)	no GO terms	no GO terms
OG0000546	1	LmjF.16.1460	kinesin	-	2363	4	F:GO:0003777; F:GO:0005524; P:GO:0007018; F:GO:0008017	F:microtubule motor activity; F:ATP binding; P:microtubule-based movement; F:microtubule binding	Coil (COILS); Coil (COILS); Coil (COILS); Coil (COILS); Coil (COILS); IPR001752 (PRINTS); IPR036961 (G3DSA:3.40.850.GENE3D); IPR001752 (PFAM); mobidb-lite (MOBIDB_LITE); mobidb-lite (MOBIDB_LITE); mobidb-lite (MOBIDB_LITE); mobidb-lite (MOBIDB_LITE); IPR027640 (PANTHER); PTHR24115:SF217 (PANTHER); IPR027640 (PANTHER); PTHR24115:SF217 (PANTHER); IPR027640 (PANTHER); PTHR24115:SF217 (PANTHER); IPR0…	F:GO:0003777; F:GO:0005524; P:GO:0007018; F:GO:0008017	F:microtubule motor activity; F:ATP binding; P:microtubule-based movement; F:microtubule binding
OG0000551	1	LmjF.35.2740	galactokinase-like protein	K00849	476	6	F:GO:0004335; F:GO:0005524; F:GO:0005534; C:GO:0005737; P:GO:0006012; P:GO:0046835	F:galactokinase activity; F:ATP binding; F:galactose binding; C:cytoplasm; P:galactose metabolic process; P:carbohydrate phosphorylation	PR00959 (PRINTS); IPR000705 (PRINTS); IPR013750 (PFAM); IPR006204 (PFAM); IPR006206 (PIRSF); IPR019539 (PFAM); IPR014721 (G3DSA:3.30.230.GENE3D); IPR036554 (G3DSA:3.30.70.GENE3D); IPR000705 (PTHR10457:PANTHER); PTHR10457 (PANTHER); IPR019741 (PROSITE_PATTERNS); IPR036554 (SUPERFAMILY); IPR020568 (SUPERFAMILY)	F:GO:0004335; F:GO:0005524; F:GO:0005534; C:GO:0005737; P:GO:0006012; F:GO:0016301; F:GO:0016773; P:GO:0046835	F:galactokinase activity; F:ATP binding; F:galactose binding; C:cytoplasm; P:galactose metabolic process; F:kinase activity; F:phosphotransferase activity, alcohol group as acceptor; P:carbohydrate phosphorylation
OG0000571	1	LmjF.25.0720	eukaryotic initiation factor 5a	K03263	166	5	F:GO:0003746; P:GO:0006452; F:GO:0043022; P:GO:0045901; P:GO:0045905	F:translation elongation factor activity; P:translational frameshifting; F:ribosome binding; P:positive regulation of translational elongation; P:positive regulation of translational termination	IPR001884 (PIRSF); IPR001884 (TIGRFAM); G3DSA:2.40.50.140 (GENE3D); IPR014722 (G3DSA:2.30.30.GENE3D); IPR020189 (PFAM); mobidb-lite (MOBIDB_LITE); mobidb-lite (MOBIDB_LITE); IPR001884 (PANTHER); PTHR11673:SF6 (PANTHER); IPR019769 (PROSITE_PATTERNS); cd04468 (CDD); IPR012340 (SUPERFAMILY); IPR008991 (SUPERFAMILY)	F:GO:0003723; F:GO:0003746; P:GO:0006452; F:GO:0043022; P:GO:0045901; P:GO:0045905	F:RNA binding; F:translation elongation factor activity; P:translational frameshifting; F:ribosome binding; P:positive regulation of translational elongation; P:positive regulation of translational termination
OG0000603	1	LmjF.30.0850	surface protein amastin	-	195	-	-	-	IPR009944 (PFAM); IPR009944 (PANTHER)	no GO terms	no GO terms
OG0000628	1	LmjF.28.0090	oxygen-sensing adenylate cyclase	-	677	5	P:GO:0009190; F:GO:0016849; F:GO:0019825; F:GO:0020037; P:GO:0035556	P:cyclic nucleotide biosynthetic process; F:phosphorus-oxygen lyase activity; F:oxygen binding; F:heme binding; P:intracellular signal transduction	IPR012292 (G3DSA:1.10.490.GENE3D); IPR000971 (PFAM); IPR001054 (PFAM); mobidb-lite (MOBIDB_LITE); PTHR22924:SF88 (PANTHER); PTHR22924 (PANTHER); IPR001054 (PROSITE_PROFILES); cd01040 (CDD); cd07302 (CDD); cd01040 (CDD); IPR029787 (SUPERFAMILY); IPR009050 (SUPERFAMILY); IPR009050 (SUPERFAMILY)	P:GO:0009190; F:GO:0016849; F:GO:0019825; F:GO:0020037; P:GO:0035556	P:cyclic nucleotide biosynthetic process; F:phosphorus-oxygen lyase activity; F:oxygen binding; F:heme binding; P:intracellular signal transduction
OG0000637	1	LmjF.05.0380	microtubule-associated protein	-	1819	-	-	-	mobidb-lite (MOBIDB_LITE); mobidb-lite (MOBIDB_LITE); mobidb-lite (MOBIDB_LITE); mobidb-lite (MOBIDB_LITE); mobidb-lite (MOBIDB_LITE); mobidb-lite (MOBIDB_LITE); mobidb-lite (MOBIDB_LITE); mobidb-lite (MOBIDB_LITE); mobidb-lite (MOBIDB_LITE); mobidb-lite (MOBIDB_LITE); mobidb-lite (MOBIDB_LITE); mobidb-lite (MOBIDB_LITE); mobidb-lite (MOBIDB_LITE); mobidb-lite (MOBIDB_LITE); mobidb-lite (MOBIDB_L…	no GO terms	no GO terms
OG0000643	1	LmjF.02.0700	hypothetical protein	-	937	-	-	-	Coil (COILS); Coil (COILS); Coil (COILS); Coil (COILS); Coil (COILS); Coil (COILS); Coil (COILS); Coil (COILS); Coil (COILS); Coil (COILS); mobidb-lite (MOBIDB_LITE); mobidb-lite (MOBIDB_LITE); mobidb-lite (MOBIDB_LITE); PTHR32083 (PANTHER); PTHR32083:SF24 (PANTHER)	no GO terms	no GO terms
OG0000671	1	LmjF.29.2600	polyA polymerase	K14376	500	5	F:GO:0003723; F:GO:0004652; C:GO:0005634; P:GO:0031123; P:GO:0043631	F:RNA binding; F:polynucleotide adenylyltransferase activity; C:nucleus; P:RNA 3'-end processing; P:RNA polyadenylation	IPR007012 (PFAM); G3DSA:3.30.460.10 (GENE3D); IPR007010 (PFAM); G3DSA:1.10.1410.10 (GENE3D); G3DSA:3.30.70.590 (GENE3D); PTHR10682:SF10 (PANTHER); IPR014492 (PANTHER); cd05402 (CDD); IPR011068 (SUPERFAMILY); SSF81631 (SUPERFAMILY); SSF81301 (SUPERFAMILY)	F:GO:0003723; F:GO:0004652; C:GO:0005634; F:GO:0016779; P:GO:0031123; P:GO:0043631	F:RNA binding; F:polynucleotide adenylyltransferase activity; C:nucleus; F:nucleotidyltransferase activity; P:RNA 3'-end processing; P:RNA polyadenylation
OG0000681	1	LmjF.34.3640	hypothetical protein	-	162	-	-	-	mobidb-lite (MOBIDB_LITE); mobidb-lite (MOBIDB_LITE); mobidb-lite (MOBIDB_LITE)	no GO terms	no GO terms
OG0000710	1	LmjF.23.0510	hypothetical protein	-	98	-	-	-	no IPS match	no IPS match	no IPS match
OG0000922	1	LmjF.27.0380	Nuclear pore complex protein 158	-	1556	3	C:GO:0005643; P:GO:0006913; F:GO:0017056	C:nuclear pore; P:nucleocytoplasmic transport; F:structural constituent of nuclear pore	IPR021967 (PFAM); IPR036903 (G3DSA:3.30.1610.GENE3D); IPR007230 (PFAM); mobidb-lite (MOBIDB_LITE); mobidb-lite (MOBIDB_LITE); mobidb-lite (MOBIDB_LITE); mobidb-lite (MOBIDB_LITE); mobidb-lite (MOBIDB_LITE); mobidb-lite (MOBIDB_LITE); mobidb-lite (MOBIDB_LITE); mobidb-lite (MOBIDB_LITE); mobidb-lite (MOBIDB_LITE); mobidb-lite (MOBIDB_LITE); mobidb-lite (MOBIDB_LITE); IPR037665 (PANTHER); IPR007230…	C:GO:0005643; P:GO:0006913; F:GO:0017056	C:nuclear pore; P:nucleocytoplasmic transport; F:structural constituent of nuclear pore
OG0001095	1	LmjF.03.0270	FYVE zinc finger/Apolipoprotein A1/A4/E domain containing protein	-	2354	5	C:GO:0005576; P:GO:0006869; F:GO:0008289; P:GO:0042157; F:GO:0046872	C:extracellular region; P:lipid transport; F:lipid binding; P:lipoprotein metabolic process; F:metal ion binding	Coil (COILS); Coil (COILS); Coil (COILS); Coil (COILS); Coil (COILS); Coil (COILS); Coil (COILS); Coil (COILS); Coil (COILS); IPR000074 (PFAM); IPR000306 (PFAM); IPR013083 (G3DSA:3.30.40.GENE3D); G3DSA:1.20.120.20 (GENE3D); mobidb-lite (MOBIDB_LITE); mobidb-lite (MOBIDB_LITE); mobidb-lite (MOBIDB_LITE); mobidb-lite (MOBIDB_LITE); PTHR34491 (PANTHER); IPR017455 (PROSITE_PROFILES); cd00065 (CDD); S…	C:GO:0005576; P:GO:0006869; F:GO:0008289; P:GO:0042157; F:GO:0046872	C:extracellular region; P:lipid transport; F:lipid binding; P:lipoprotein metabolic process; F:metal ion binding
OG0006276	1	LmjF.28.2205	ribosomal protein S29	K02980	57	4	F:GO:0003735; C:GO:0005840; P:GO:0006412; F:GO:0008270	F:structural constituent of ribosome; C:ribosome; P:translation; F:zinc ion binding	G3DSA:4.10.830.10 (GENE3D); IPR001209 (PFAM); PTHR12010:SF2 (PANTHER); IPR039744 (PANTHER)	F:GO:0003735; C:GO:0005622; C:GO:0005840; P:GO:0006412; F:GO:0008270	F:structural constituent of ribosome; C:intracellular; C:ribosome; P:translation; F:zinc ion binding
OG0006621	1	LmjF.35.0920	hypothetical protein	-	1345	-	-	-	mobidb-lite (MOBIDB_LITE); mobidb-lite (MOBIDB_LITE); mobidb-lite (MOBIDB_LITE); mobidb-lite (MOBIDB_LITE); mobidb-lite (MOBIDB_LITE); mobidb-lite (MOBIDB_LITE); mobidb-lite (MOBIDB_LITE); mobidb-lite (MOBIDB_LITE); mobidb-lite (MOBIDB_LITE); mobidb-lite (MOBIDB_LITE); mobidb-lite (MOBIDB_LITE); mobidb-lite (MOBIDB_LITE)	no GO terms	no GO terms
