# Supplementary material for: Comparative genomics of Leishmania (Mundinia)
Source: BMC Genomics. 2019 Oct 11;20:726. doi: 10.1186/s12864-019-6126-y (PMC6787982; doi:10.1186/s12864-019-6126-y)
Supplement: Supplementary file 27 — Additional file 27: Table S12. Gene family expansion and contractions at the Leishmania/ Sauroleishmania/ Viannia node. [file 12864_2019_6126_MOESM27_ESM.xlsx]

## Sheet: Suppl. Table 11
Gene family expansions at the Leishmania (Leishmania) node
				BLAST2GO data
OG group	Change in gene number	Representative gene	Annotation	KEGG ID	Description	Length, aa	#Hits	E-value	sim mean	#GO	GO IDs	GO Names	InterPro IDs	InterPro GO IDs	InterPro GO Names
OG0000131	1	LENLEM3045_060019800.1	hypothetical protein	-	-	66	-	-	-	-	-	-	mobidb-lite (MOBIDB_LITE)	no GO terms	no GO terms
OG0000364	1	LmjF.16.0880	hypothetical protein	-	-	310	-	-	-	-	-	-	mobidb-lite (MOBIDB_LITE); mobidb-lite (MOBIDB_LITE)	no GO terms	no GO terms
OG0000425	5	LENLEM3045_000023000.1	hypothetical protein	-	-	67	-	-	-	-	-	-	mobidb-lite (MOBIDB_LITE); mobidb-lite (MOBIDB_LITE)	no GO terms	no GO terms
OG0000451	1	LmjF.02.0680	hypothetical protein	-	-	501	-	-	-	2	F:GO:0003697; C:GO:0005666	F:single-stranded DNA binding; C:RNA polymerase III complex	IPR036388 (G3DSA:1.10.10.GENE3D); mobidb-lite (MOBIDB_LITE); IPR039748 (PANTHER)	F:GO:0003697; C:GO:0005666	F:single-stranded DNA binding; C:RNA polymerase III complex
OG0000531	1	LmjF.30.0330	Rab-GTPase-TBC domain containing protein	K22555	-	850	-	-	-	1	P:GO:0042147	P:retrograde transport, endosome to Golgi	G3DSA:1.10.472.80 (GENE3D); IPR000195 (PFAM); mobidb-lite (MOBIDB_LITE); mobidb-lite (MOBIDB_LITE); mobidb-lite (MOBIDB_LITE); mobidb-lite (MOBIDB_LITE); IPR039755 (PANTHER); IPR001763 (PROSITE_PROFILES); IPR035969 (SUPERFAMILY)	P:GO:0042147	P:retrograde transport, endosome to Golgi
OG0000554	1	LmjF.31.1320	protein phosphatase 2C	-	-	2563	-	-	-	3	F:GO:0004722; P:GO:0006470; F:GO:0043169	F:protein serine/threonine phosphatase activity; P:protein dephosphorylation; F:cation binding	IPR001932 (PFAM); IPR036457 (G3DSA:3.60.40.GENE3D); mobidb-lite (MOBIDB_LITE); mobidb-lite (MOBIDB_LITE); mobidb-lite (MOBIDB_LITE); mobidb-lite (MOBIDB_LITE); mobidb-lite (MOBIDB_LITE); mobidb-lite (MOBIDB_LITE); mobidb-lite (MOBIDB_LITE); mobidb-lite (MOBIDB_LITE); mobidb-lite (MOBIDB_LITE); mobidb-lite (MOBIDB_LITE); mobidb-lite (MOBIDB_LITE); mobidb-lite (MOBIDB_LITE); mobidb-lite (MOBIDB_LIT…	F:GO:0003824; F:GO:0004722; P:GO:0006470; F:GO:0043169	F:catalytic activity; F:protein serine/threonine phosphatase activity; P:protein dephosphorylation; F:cation binding
OG0000725	1	LmjF.34.3220	aminophospholipid translocase	K01530	-	1157	-	-	-	5	F:GO:0000287; F:GO:0004012; F:GO:0005524; P:GO:0015914; C:GO:0016021	F:magnesium ion binding; F:phospholipid-translocating ATPase activity; F:ATP binding; P:phospholipid transport; C:integral component of membrane	PR00119 (PRINTS); IPR032631 (PFAM); IPR023214 (G3DSA:3.40.50.GENE3D); PF13246 (PFAM); G3DSA:2.70.150.10 (GENE3D); IPR006539 (TIGRFAM); IPR023299 (G3DSA:3.40.1110.GENE3D); IPR001757 (TIGRFAM); IPR032630 (PFAM); PF00122 (PFAM),SFLDS00003 (SFLD),SFLDF00027 (SFLD),SFLDG00002 (SFLD); mobidb-lite (MOBIDB_LITE); mobidb-lite (MOBIDB_LITE); mobidb-lite (MOBIDB_LITE); IPR006539 (PANTHER); PTHR24092:SF5 (PA…	F:GO:0000166; F:GO:0000287; F:GO:0004012; F:GO:0005524; P:GO:0015914; C:GO:0016021	F:nucleotide binding; F:magnesium ion binding; F:phospholipid-translocating ATPase activity; F:ATP binding; P:phospholipid transport; C:integral component of membrane
OG0001547	1	LmjF.15.1050	developmentally regulated protein	-	-	116	-	-	-	-	-	-	mobidb-lite (MOBIDB_LITE)	no GO terms	no GO terms
OG0004230	1	LinJ.07.0730	vacuolar-type Ca2+-ATPase	-	-	223	-	-	-	-	-	-	no IPS match	no IPS match	no IPS match
OG0005916	3	LmjF.04.0900	hypothetical protein	-	-	1892	-	-	-	-	-	-	Coil (COILS); Coil (COILS); mobidb-lite (MOBIDB_LITE); mobidb-lite (MOBIDB_LITE); mobidb-lite (MOBIDB_LITE); mobidb-lite (MOBIDB_LITE); mobidb-lite (MOBIDB_LITE); mobidb-lite (MOBIDB_LITE); mobidb-lite (MOBIDB_LITE); mobidb-lite (MOBIDB_LITE); mobidb-lite (MOBIDB_LITE); mobidb-lite (MOBIDB_LITE); mobidb-lite (MOBIDB_LITE); mobidb-lite (MOBIDB_LITE); mobidb-lite (MOBIDB_LITE); mobidb-lite (MOBIDB_…	no GO terms	no GO terms
OG0006737	1	LmjF.16.1170	60S ribosomal protein L39	K02924	-	51	-	-	-	3	F:GO:0003735; C:GO:0005840; P:GO:0006412	F:structural constituent of ribosome; C:ribosome; P:translation	IPR023626 (G3DSA:1.10.1620.GENE3D); IPR000077 (PFAM); PTHR19970:SF13 (PANTHER); IPR000077 (PANTHER); IPR020083 (PROSITE_PATTERNS); PD007914 (PRODOM); IPR000077 (HAMAP); IPR023626 (SUPERFAMILY)	F:GO:0003735; C:GO:0005622; C:GO:0005840; P:GO:0006412	F:structural constituent of ribosome; C:intracellular; C:ribosome; P:translation
Gene family contractions at the Leishmania (Leishmania) node
				BLAST2GO data	-	-	-	-	-	-	-	-	-	-
OG group	Change in gene number	Representative gene	Annotation	KEGG ID	Description	Length, aa	#Hits	E-value	sim mean	#GO	GO IDs	GO Names	InterPro IDs	InterPro GO IDs	InterPro GO Names
OG0000134	2	CFAC1_250034600	tyrosine/nicotianamine family aminotransferase	K00815	tyrosine transaminase	415	10	0	75.17	4	P:GO:0006520; F:GO:0008483; P:GO:0009058; F:GO:0030170	P:cellular amino acid metabolic process; F:transaminase activity; P:biosynthetic process; F:pyridoxal phosphate binding	IPR015422 (G3DSA:3.90.1150.GENE3D); IPR005958 (TIGRFAM); IPR004839 (PFAM); IPR015421 (G3DSA:3.40.640.GENE3D); IPR005958 (PIRSF); mobidb-lite (MOBIDB_LITE); PTHR11751 (PANTHER); PTHR11751:SF368 (PANTHER); cd00609 (CDD); IPR015424 (SUPERFAMILY)	F:GO:0003824; P:GO:0006520; F:GO:0008483; P:GO:0009058; F:GO:0030170	F:catalytic activity; P:cellular amino acid metabolic process; F:transaminase activity; P:biosynthetic process; F:pyridoxal phosphate binding
OG0000636	1	CFAC1_300039900	subtilisin-like serine peptidase	-	subtilisin-like serine peptidase	1694	10	0	73.78	2	F:GO:0004930; C:GO:0016020	F:G protein-coupled receptor activity; C:membrane	Coil (COILS); IPR013111 (PFAM); G3DSA:2.10.25.10 (GENE3D); mobidb-lite (MOBIDB_LITE); mobidb-lite (MOBIDB_LITE); PTHR24035:SF109 (PANTHER); PTHR24035 (PANTHER); IPR013032 (PROSITE_PATTERNS); IPR013032 (PROSITE_PATTERNS); IPR013032 (PROSITE_PATTERNS); IPR013032 (PROSITE_PATTERNS); IPR013032 (PROSITE_PATTERNS); TRANSMEMBRANE (PHOBIUS); CYTOPLASMIC_DOMAIN (PHOBIUS); TRANSMEMBRANE (PHOBIUS); CYTOPLAS…	F:GO:0004930; C:GO:0016020	F:G protein-coupled receptor activity; C:membrane
OG0000687	1	CFAC1_290028400	HPP family protein	-	HPP family protein	269	10	1.16656e-130	74.59	1	C:GO:0016021	C:integral component of membrane	IPR007065 (PFAM); mobidb-lite (MOBIDB_LITE); mobidb-lite (MOBIDB_LITE); PTHR33741 (PANTHER); TRANSMEMBRANE (PHOBIUS); TRANSMEMBRANE (PHOBIUS); NON_CYTOPLASMIC_DOMAIN (PHOBIUS); TRANSMEMBRANE (PHOBIUS); NON_CYTOPLASMIC_DOMAIN (PHOBIUS); TRANSMEMBRANE (PHOBIUS); TRANSMEMBRANE (PHOBIUS); CYTOPLASMIC_DOMAIN (PHOBIUS); NON_CYTOPLASMIC_DOMAIN (PHOBIUS); CYTOPLASMIC_DOMAIN (PHOBIUS); CYTOPLASMIC_DOMAIN …	no GO terms	no GO terms
OG0002320	1	CFAC1_110009700	hypothetical protein	-	solute carrier family 36 (proton-coupled amino acid transporter)	952	10	0	62.58	1	C:GO:0016021	C:integral component of membrane	IPR013057 (PFAM); mobidb-lite (MOBIDB_LITE); mobidb-lite (MOBIDB_LITE); mobidb-lite (MOBIDB_LITE); mobidb-lite (MOBIDB_LITE); mobidb-lite (MOBIDB_LITE); mobidb-lite (MOBIDB_LITE); mobidb-lite (MOBIDB_LITE); mobidb-lite (MOBIDB_LITE); mobidb-lite (MOBIDB_LITE); mobidb-lite (MOBIDB_LITE); mobidb-lite (MOBIDB_LITE); mobidb-lite (MOBIDB_LITE); mobidb-lite (MOBIDB_LITE); PTHR22950:SF349 (PANTHER); PTH…	no GO terms	no GO terms
OG0002326	1	CFAC1_300088100	hypothetical protein	-	-	662	10	0	68.96	2	C:GO:0005768; C:GO:0016020	C:endosome; C:membrane	mobidb-lite (MOBIDB_LITE); mobidb-lite (MOBIDB_LITE); mobidb-lite (MOBIDB_LITE); mobidb-lite (MOBIDB_LITE); TRANSMEMBRANE (PHOBIUS); SIGNAL_PEPTIDE_C_REGION (PHOBIUS); SIGNAL_PEPTIDE (PHOBIUS); NON_CYTOPLASMIC_DOMAIN (PHOBIUS); SIGNAL_PEPTIDE_N_REGION (PHOBIUS); CYTOPLASMIC_DOMAIN (PHOBIUS); SIGNAL_PEPTIDE_H_REGION (PHOBIUS); SignalP-noTM (SIGNALP_EUK); TMhelix (TMHMM)	no GO terms	no GO terms
OG0005237	1	CFAC1_260014000	SNF2 family N-terminal domain/Ring finger domain/Helicase conserved C-terminal domain containing protein	-	SNF2_family_N-terminal_domain/DEAD/DEAH_box_helicase/Ring_finger_domain /Zinc_finger_-_C3HC4_type_(RING_finger)/Helicase_conserved_C-terminal_domain_containing_protein_-_putative	1909	10	0	59.5	1	F:GO:0005524	F:ATP binding	IPR014001 (SMART); IPR001650 (SMART); IPR001841 (SMART); G3DSA:3.40.50.300 (GENE3D); IPR027370 (PFAM); IPR000330 (PFAM); IPR038718 (G3DSA:3.40.50.GENE3D); IPR013083 (G3DSA:3.30.40.GENE3D); IPR001650 (PFAM); mobidb-lite (MOBIDB_LITE); mobidb-lite (MOBIDB_LITE); mobidb-lite (MOBIDB_LITE); mobidb-lite (MOBIDB_LITE); mobidb-lite (MOBIDB_LITE); mobidb-lite (MOBIDB_LITE); mobidb-lite (MOBIDB_LITE); mob…	F:GO:0005524	F:ATP binding
OG0006146	1	CFAC1_040013000	hypothetical protein	-	-	1046	10	5.56399e-134	64.29	2	C:GO:0016020; C:GO:0016021	C:membrane; C:integral component of membrane	mobidb-lite (MOBIDB_LITE); mobidb-lite (MOBIDB_LITE); mobidb-lite (MOBIDB_LITE); SIGNAL_PEPTIDE_H_REGION (PHOBIUS); SIGNAL_PEPTIDE (PHOBIUS); SIGNAL_PEPTIDE_N_REGION (PHOBIUS); NON_CYTOPLASMIC_DOMAIN (PHOBIUS); SIGNAL_PEPTIDE_C_REGION (PHOBIUS); PS51257 (PROSITE_PROFILES); SignalP-noTM (SIGNALP_EUK); SignalP-TM (SIGNALP_GRAM_POSITIVE)	no GO terms	no GO terms
